# Supplementary material for: Myeloid Pannexin-1 mediates acute leukocyte infiltration and leads to worse outcomes after brain trauma
Source: PubMed Central journal article supplement (PMC7441665; doi:10.1186/s12974-020-01917-y), 2020-08-20
Supplement: 12974_2020_1917_MOESM1_ESM.pdf [file 12974_2020_1917_MOESM1_ESM.pdf]

# Supplementary Figure 1

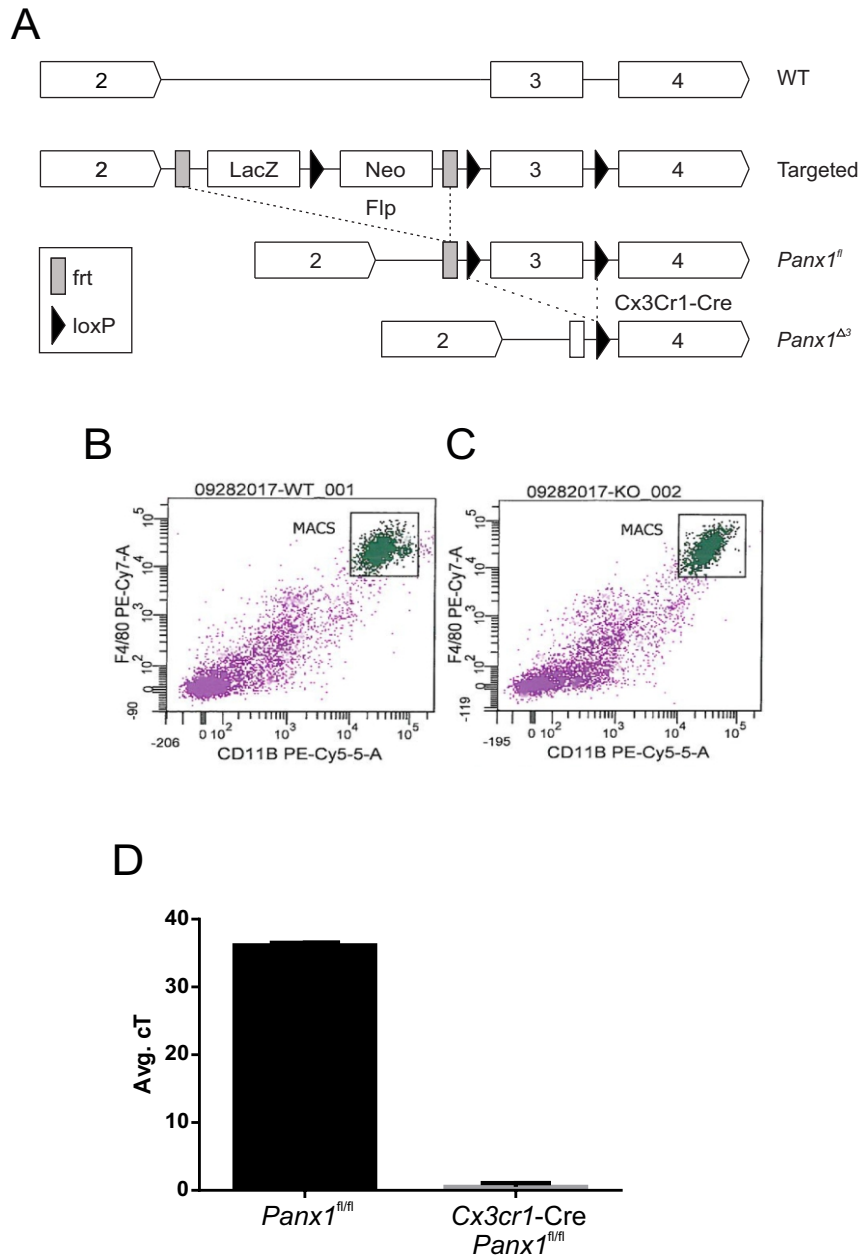

## Supplementary Fig. 1 Generation of *Cx3cr1-Cre::Panx1*<sup>fl/fl</sup> transgenic mice

Mice harboring *Panx1* deletion was generated using the cre-loxP system (34). *Panx1*<sup>tm1a(KOMP)Wtsi</sup> mice containing 2 loxP sequences flanking exon 3 of the *Panx1* gene were obtained from KOMP repository, and then bred to mice harboring FLP1 recombinase gene under the control of the human ACTB promoter (Jax mice: ACTB:FLPe B6N, stock number 019100) to generate homozygous *Panx1*<sup>fl/fl</sup> mice. These mice were crossed with C57BL/6J mice that express Cre recombinase under the direction of the *Cx3cr1* promoter (Jax mice: B6N(Cg)-*Cx3cr1*<sup>tm1.1(cre)Jung/J</sup>, stock number 025524) and then backcrossed 8 generations to yield the myeloid conditional knockout *Cx3cr1-Cre::Panx1*<sup>fl/fl</sup> mice. To generate myeloid reporter mice with *Panx1* deletion mutation, we crossed *Panx1*<sup>fl/fl</sup> and *Cx3cr1-Cre::Panx1*<sup>fl/fl</sup> mice with *Cx3Cr1*<sup>EGFP/EGFP</sup> mice.

**(A)** Targeting strategy for conditional deletion of *Panx1*. Peripheral macrophages were isolated using FACS from **(B)** Floxed and **(C)** conditional- knockout mice. **(D)** mRNA expression of wild-type *panx1* in peritoneal macrophages. Statistical significance was evaluated using one way ;  $n \geq 3$  per group. N.D. Non-detected
