# Supplementary material for: Myeloid Pannexin-1 mediates acute leukocyte infiltration and leads to worse outcomes after brain trauma
Source: PubMed Central journal article supplement (PMC7441665; doi:10.1186/s12974-020-01917-y), 2020-08-20
Supplement: 12974_2020_1917_MOESM2_ESM.pdf [file 12974_2020_1917_MOESM2_ESM.pdf]

# Supplementary Figure 2

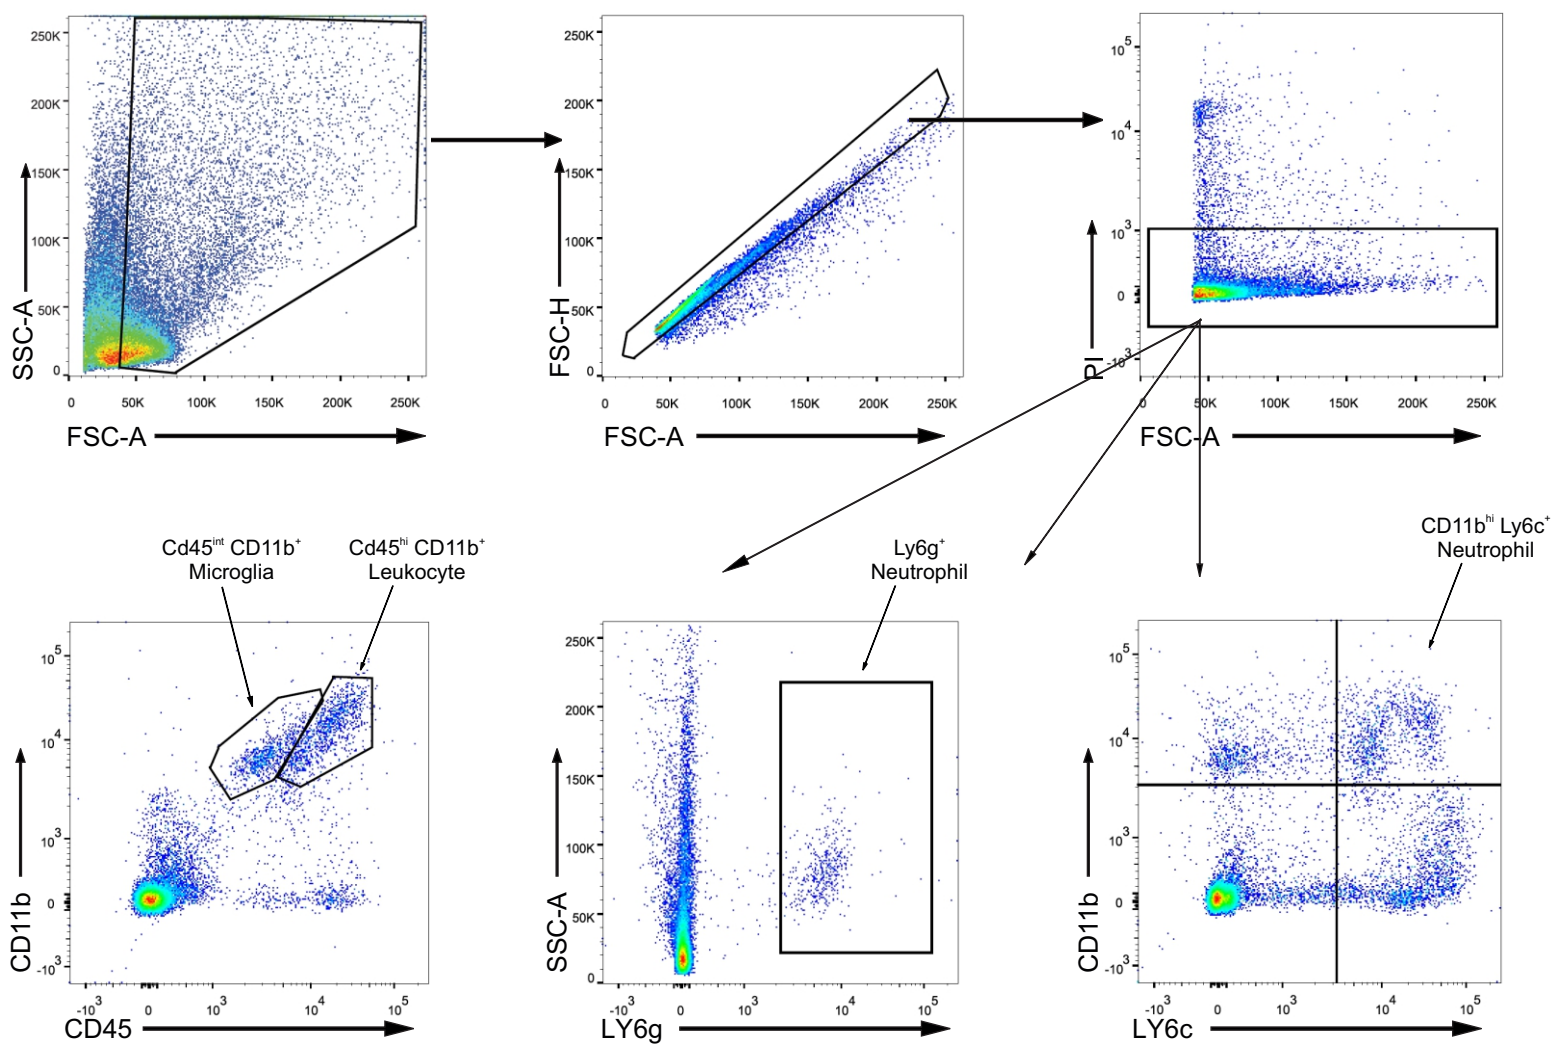

## Supplementary Fig. 2 Gating strategy for brain immune cells

Flow cytometry analysis showing brain-resident microglia, peripheral leukocytes, inflammatory monocytes and neutrophils.
