# Supplementary material for: Myeloid Pannexin-1 mediates acute leukocyte infiltration and leads to worse outcomes after brain trauma
Source: PubMed Central journal article supplement (PMC7441665; doi:10.1186/s12974-020-01917-y), 2020-08-20
Supplement: 12974_2020_1917_MOESM3_ESM.pdf [file 12974_2020_1917_MOESM3_ESM.pdf]

# Supplementary Figure 3

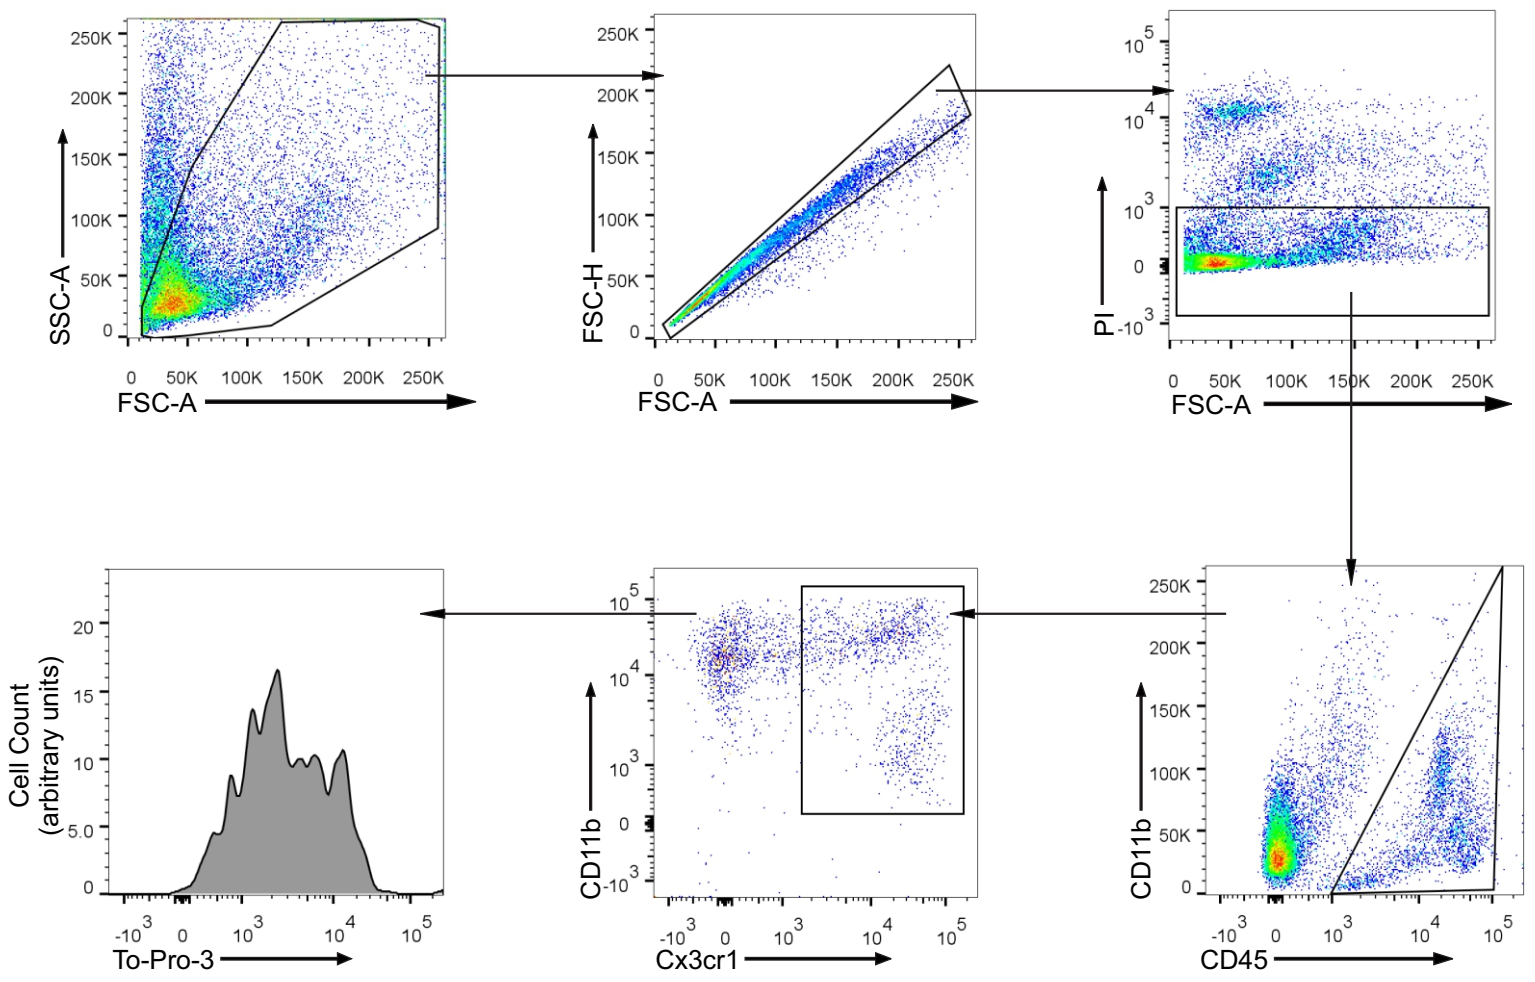

**Supplementary Fig. 3 Gating strategy for To-Pro-3 uptake**  
Flow cytometry analysis showing Cx3Cr1-EGFP cells and To-Pro-3 uptake.
